# Supplementary material
Source: PubMed Central journal article supplement (PMC2835143)
Supplement: mt200951x1.pdf [file mt200951x1.pdf]

A

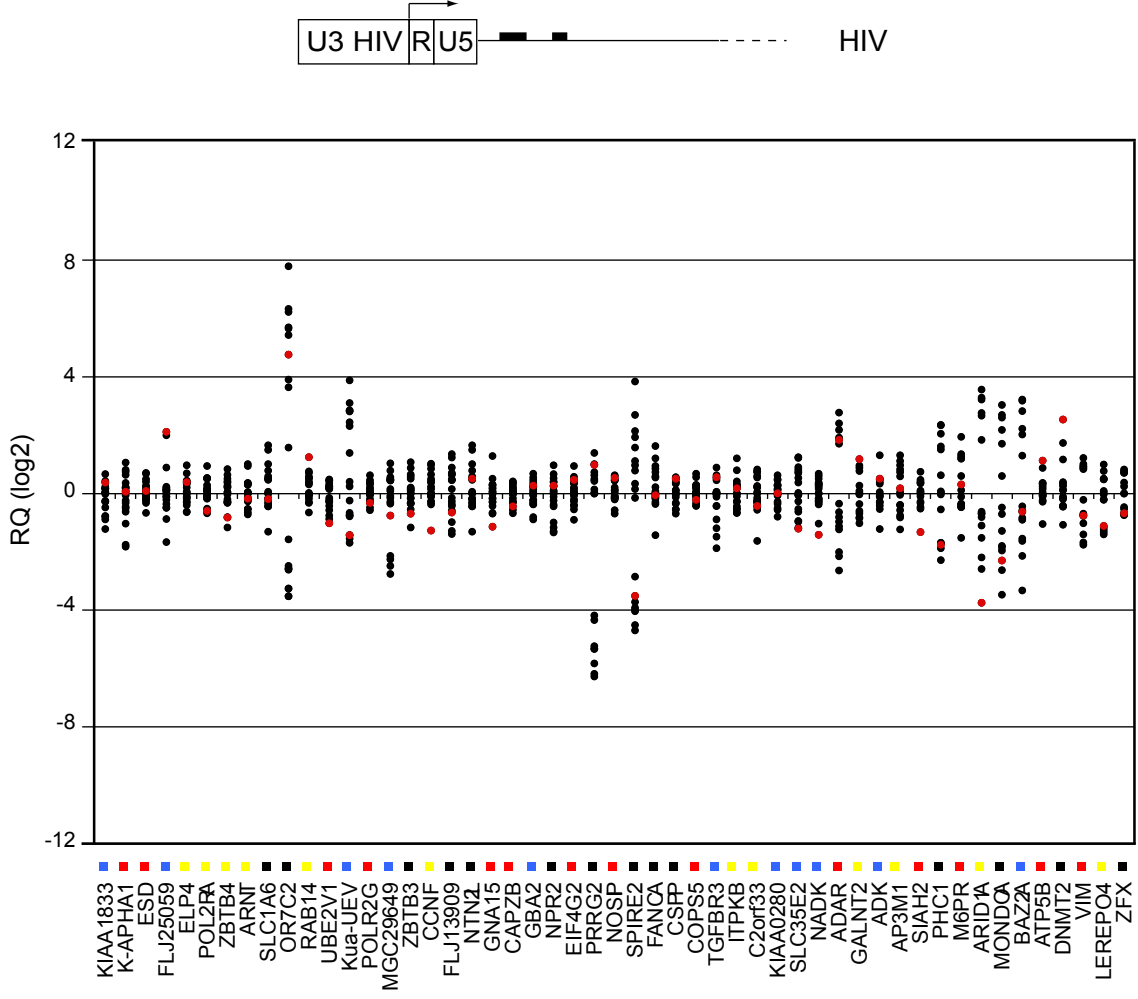

B

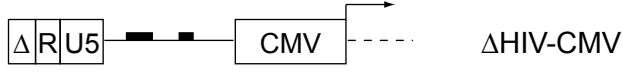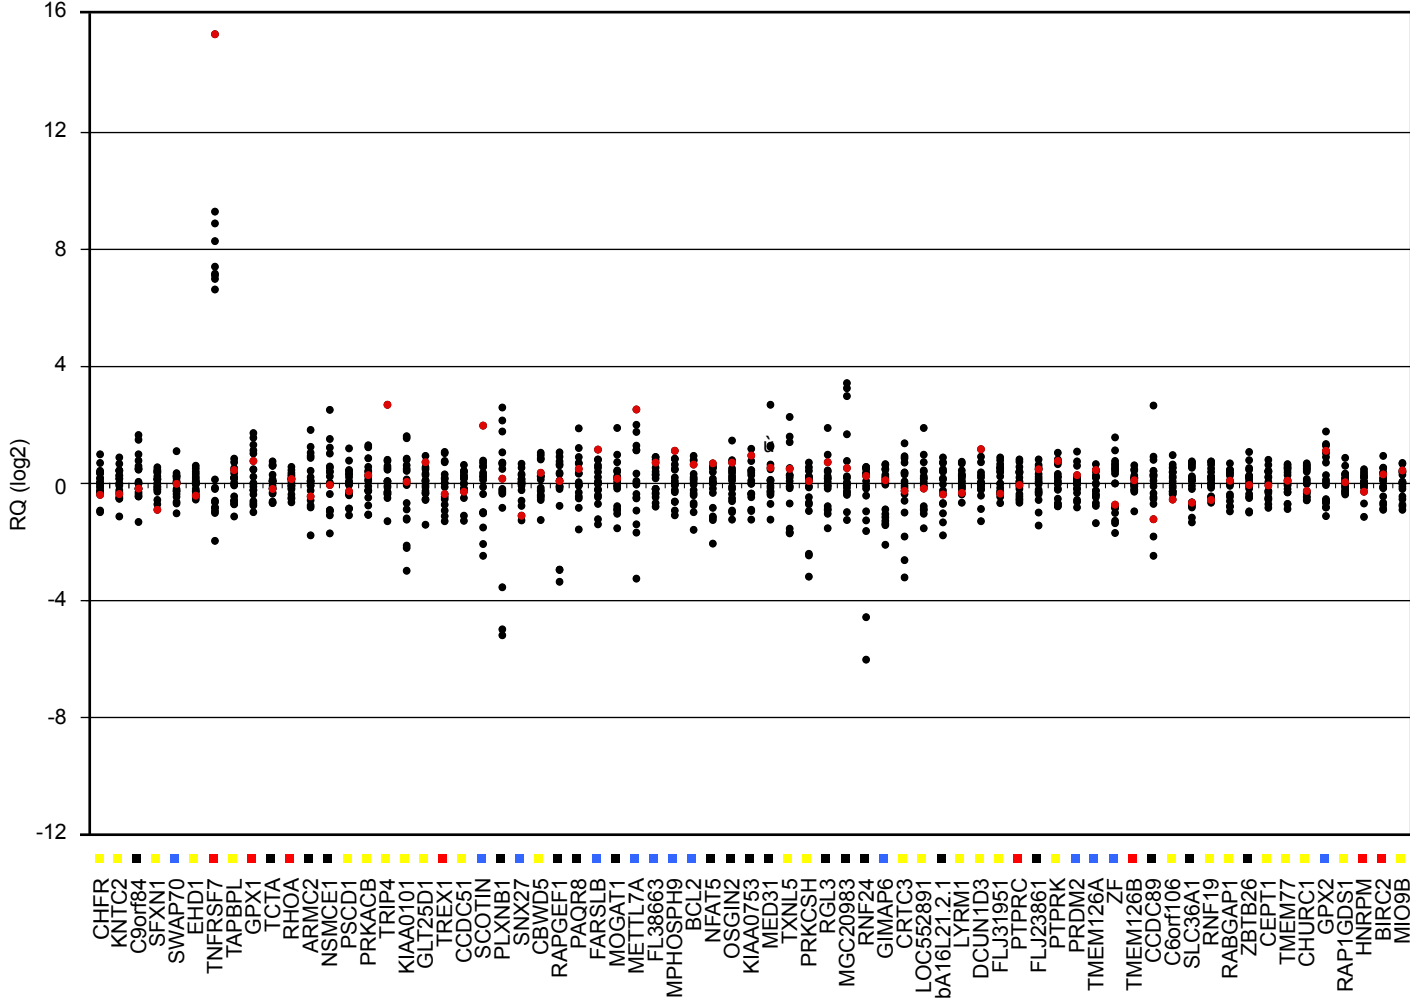

C

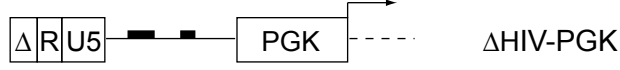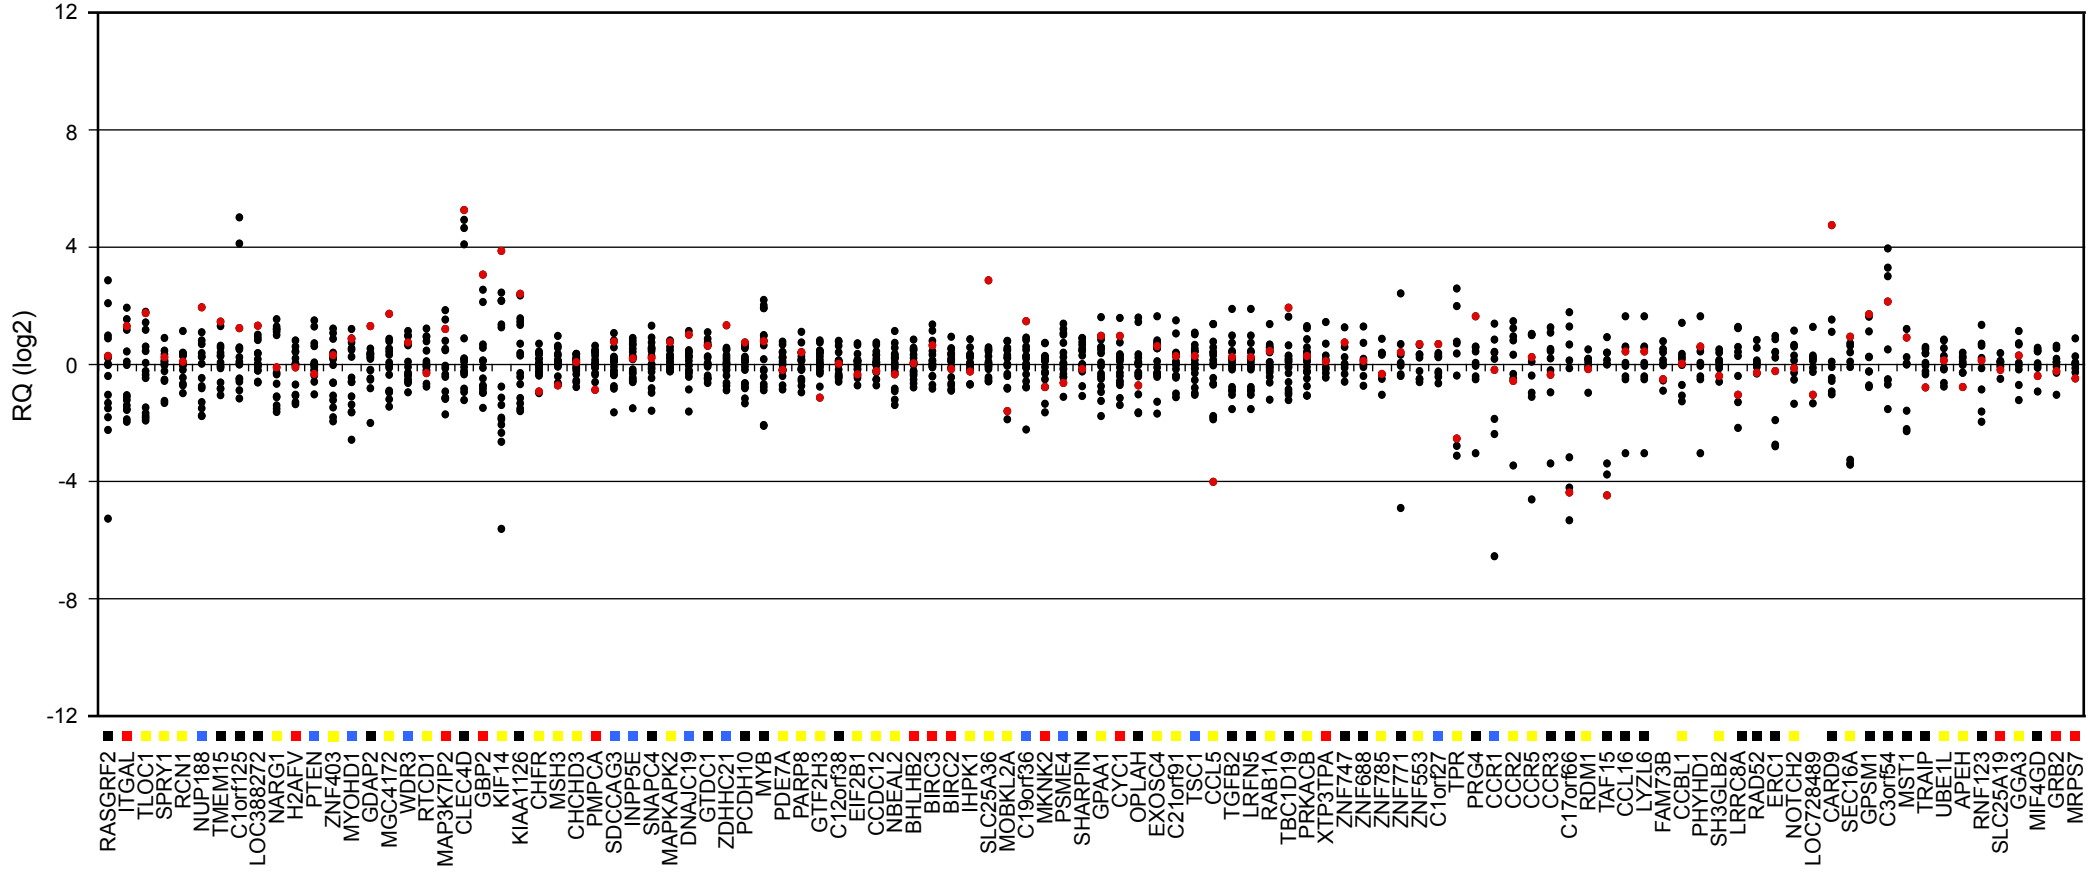

D

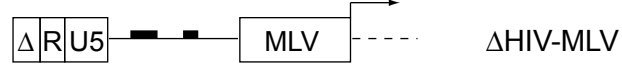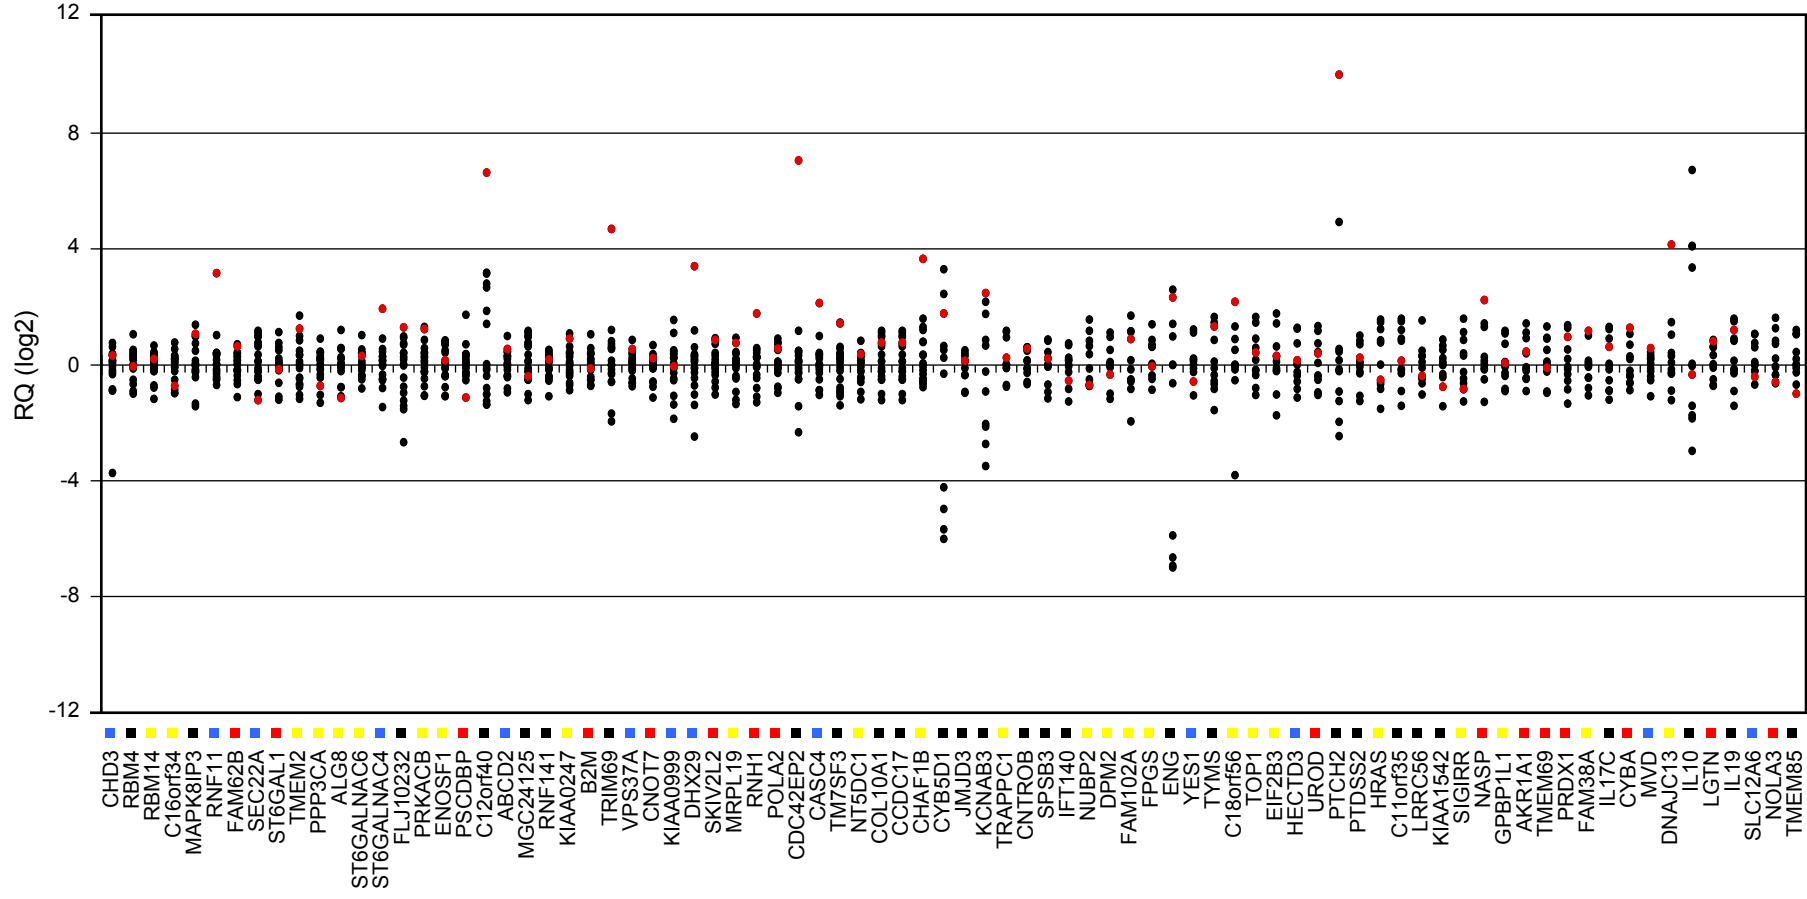

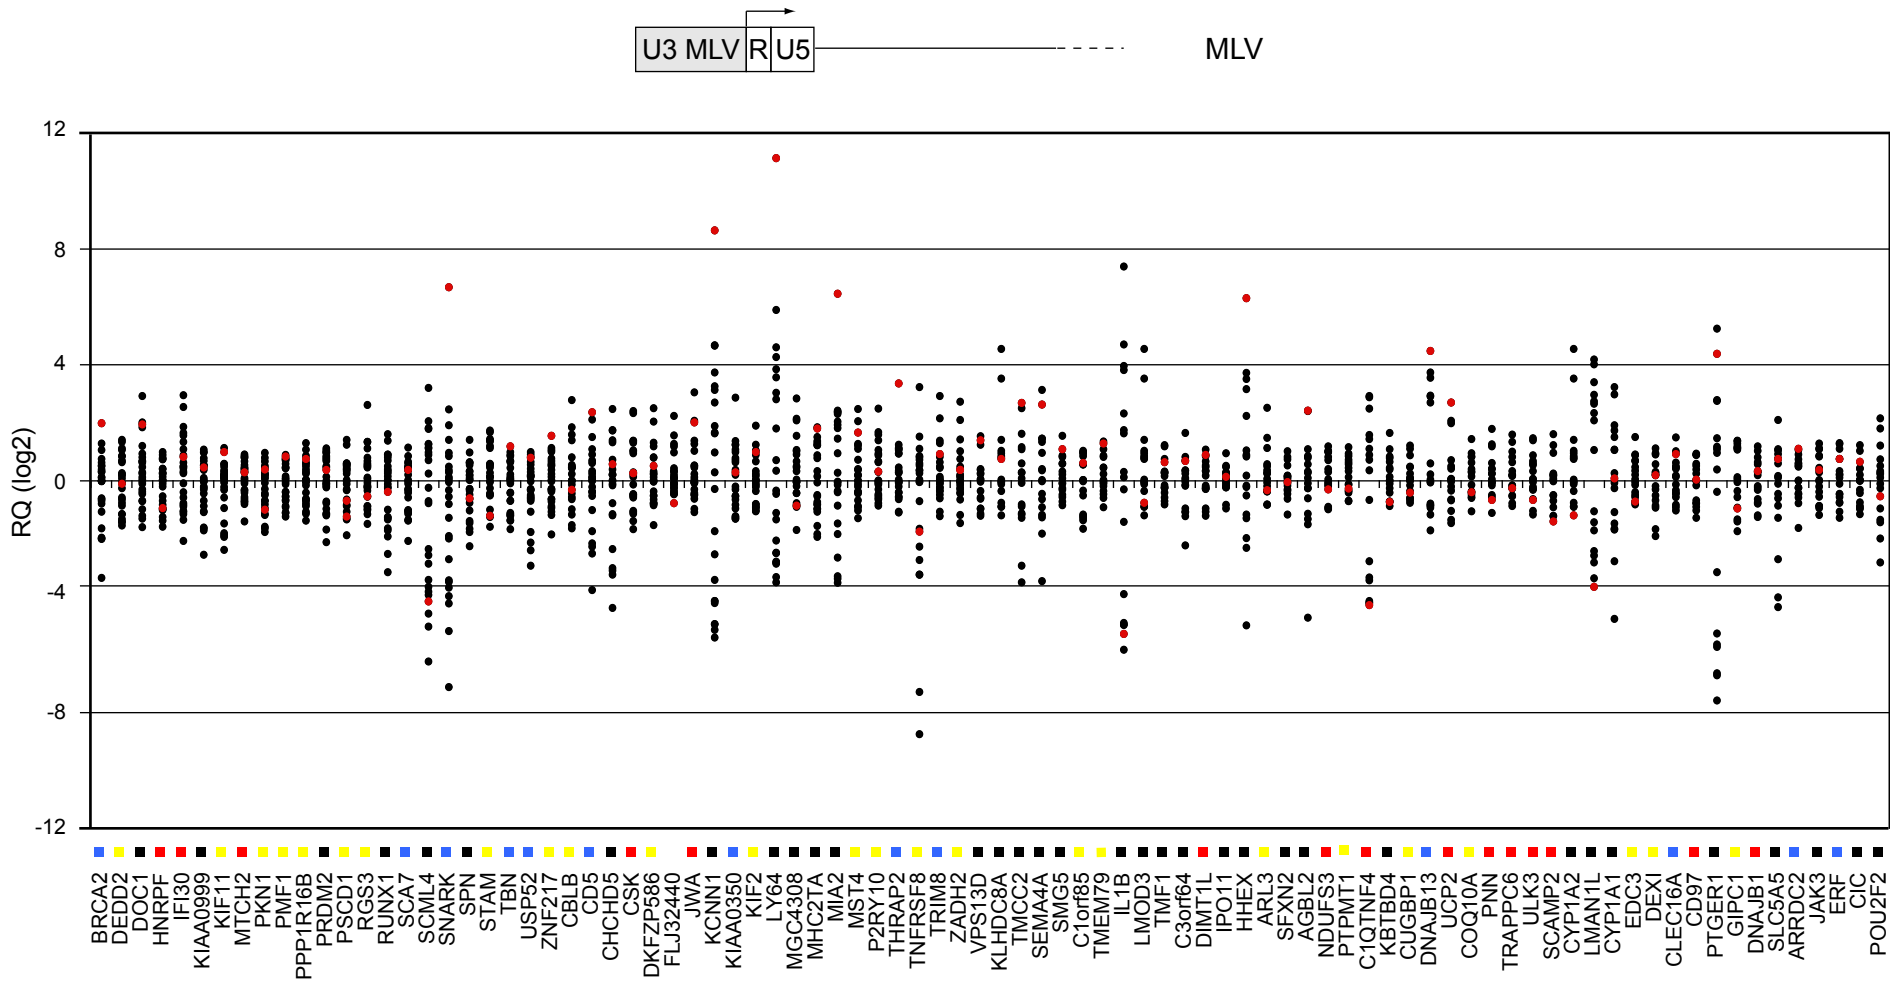

F

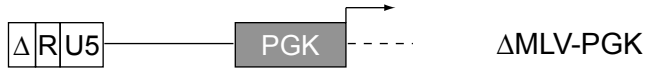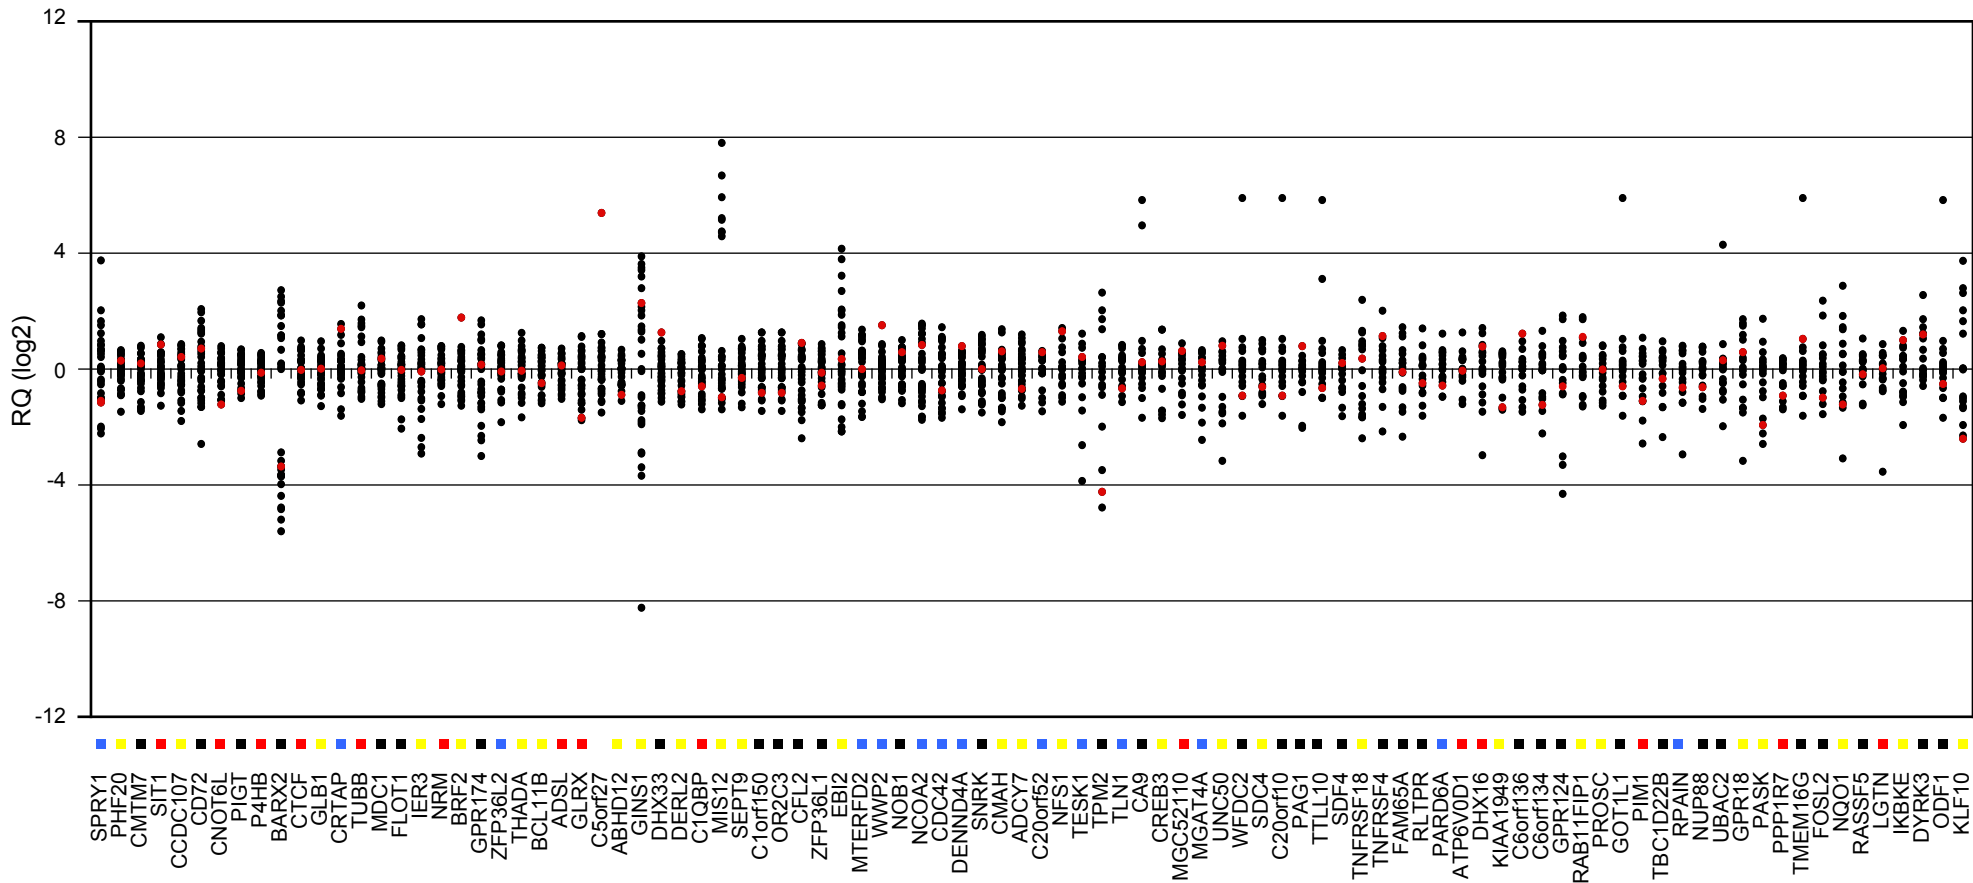

**Figure S1.** (A-F) Quantitative PCR analysis of the expression in individual T-cell clones of all the analyzed genes in a window of  $\pm 100$ -kb around the integration sites of the RV and LV vectors indicated in Figure 1A. Expression levels ( $y$  axis) were measured as relative mRNA quantity (RQ) after normalization for the level of GAPDH, and plotted as  $\log_2$  variations from the median level (0) in all analyzed clones. For each gene ( $x$  axis), the expression value in the test clone is indicated by red dots, the expression values in the control clones (10 to 31) are indicated by black dots. Color-coded symbols on the  $x$ -axis indicate the average expression level of each gene in proliferating T cells as determined by Affymetrix microarray analysis (black: no expression; blue: low expression; yellow: intermediate expression; red: high expression). The name and schematic structure of the analyzed vector is indicated above each panel.
