# Supplementary material
Source: PubMed Central journal article supplement (PMC2835143)
Supplement: mt200951x2.pdf [file mt200951x2.pdf]

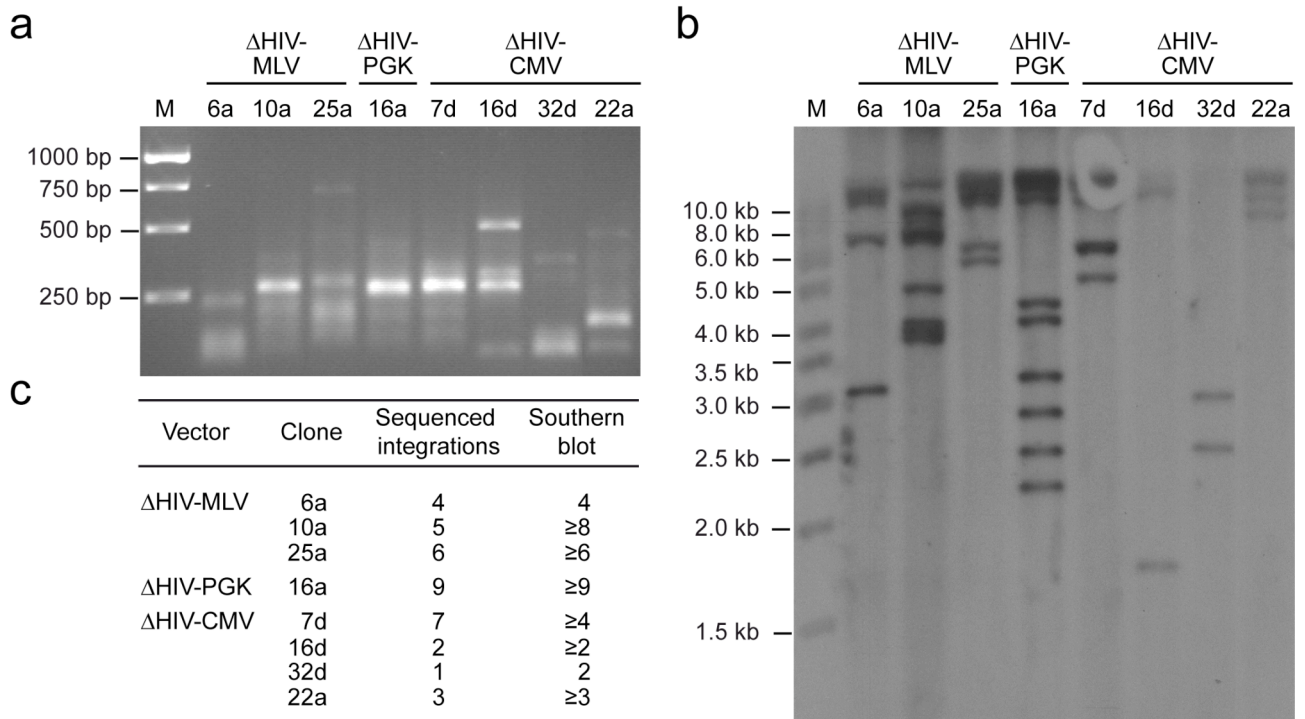

**Figure S2.** Analysis of lentiviral integration sites. (a) Representative LM-PCR analysis of clones transduced with each of the indicated lentiviral vectors. (b) Representative Southern blot analysis of the same clones of panel (a). 5  $\mu$ g of genomic DNA were digested with *Bam*HI, unique site into the backbone of the lentiviral vectors, and hybridized to a green fluorescent protein (GFP) probe, indicating the integrated vector copy number in a single clone. Clone names are indicated above each lane. (c) The table compares, for each clone, the number of integrations mapped and sequenced by LM-PCR and the number of proviruses shown in the Southern blot. Molecular weight markers (M) are indicated on the left of panel (a) and (b).
